# Supplementary material
Source: ML conference proceedings conference paper supplement (https://openreview.net/forum?id=PDYs7Z2XFGv)

The layer with multiple prime size kernels

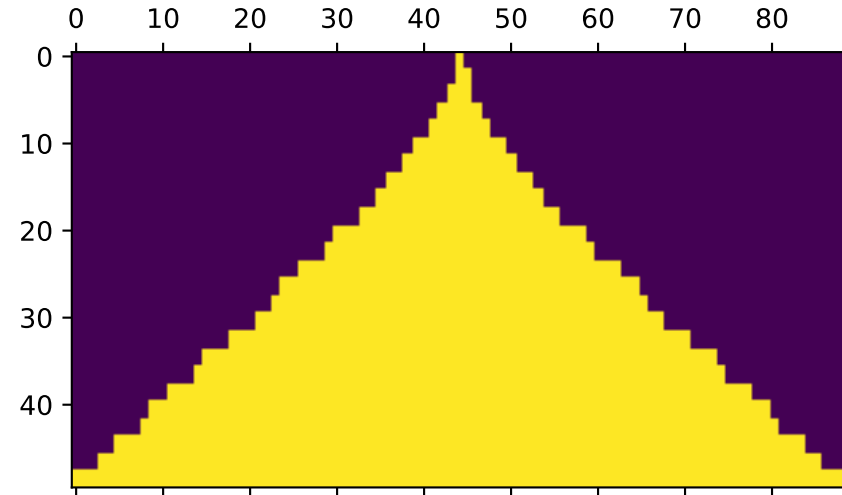

The dialiated layer with multiple prime size kernels

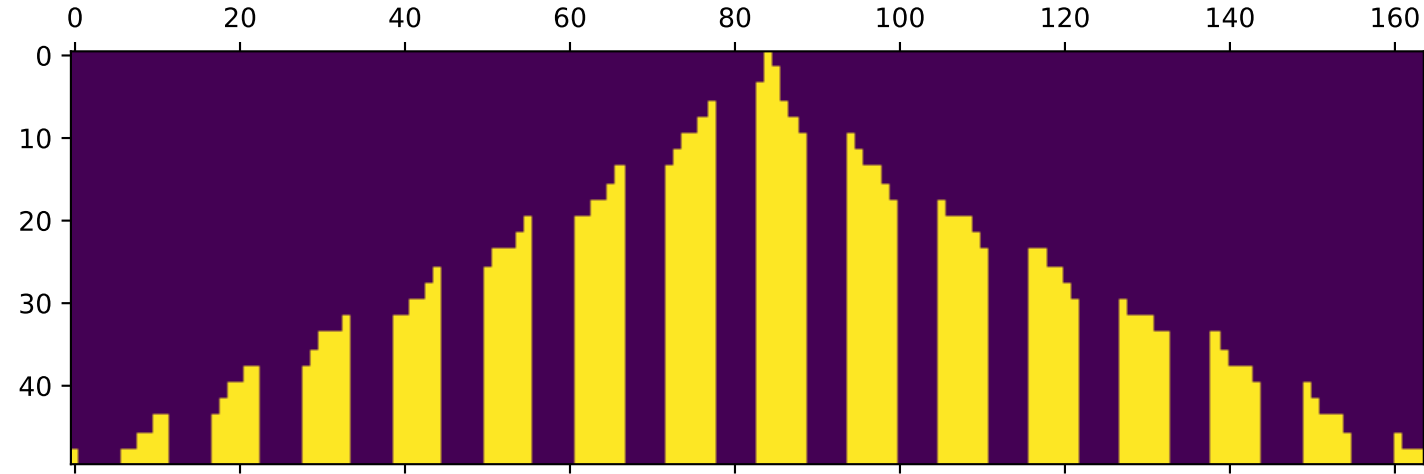

Supplement: supplementary_material [file attachment]
