# Supplementary material
Source: ML conference proceedings conference paper supplement (https://openreview.net/forum?id=PDYs7Z2XFGv)
Supplement: supplementary_material [file attachment]

Accuracy range - accuracy of OS-CNN

Dataset sorted by: Max(accuracy range)- accuracy of OS-CNN and dataset type

0.2  
0.0  
-0.2  
-0.4  
-0.6  
-0.8  
-1.0

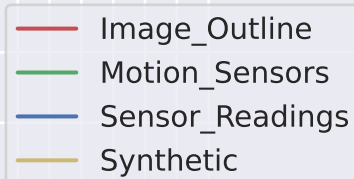

DiatomSizeReduction  
WordSynonyms  
FiftyWords  
MedicalImages  
ProximalPhalanxOutlineCorrect  
Yoga  
PhalangesOutlinesCorrect  
FaceAll  
FacesUCR  
SwedishLeaf  
DistalPhalanxOutlineAgeGroup  
Adiac  
Car  
Plane  
MiddlePhalanxTW  
ShapesAll  
Symbols  
Fish  
HandOutlines  
DistalPhalanxOutlineCorrect  
MiddlePhalanxOutlineCorrect  
ProximalPhalanxTW  
FaceFour  
ArrowHead  
ProximalPhalanxOutlineAgeGroup  
OSULeaf  
Worms  
MiddlePhalanxOutlineAgeGroup  
DistalPhalanxTW  
Herring  
BeetleFly  
BirdChicken  
WormsTwoClass  
CricketX  
UWaveGestureLibraryY  
UWaveGestureLibraryZ  
CricketY  
CricketZ  
UWaveGestureLibraryAll  
UWaveGestureLibraryX  
ToeSegmentation2  
InlineSkate  
GunPoint  
ToeSegmentation1  
Haptics  
OliveOil  
InsectWingbeatSound  
ChlorineConcentration  
NonInvasiveFetalECGThorax2  
NonInvasiveFetalECGThorax1  
SonyAIBORobotSurface1  
LargeKitchenAppliances  
ECGFiveDays  
ECG200  
Strawberry  
FordB  
TwoPatterns  
Coffee  
Trace  
Wafer  
Beef  
StarLightCurves  
ElectricDevices  
ECG5000  
MoteStrain  
SonyAIBORobotSurface2  
Wine  
FordA  
Lightning7  
ItalyPowerDemand  
Meat  
Earthquakes  
RefrigerationDevices  
CinCECGTorso  
Phoneme  
Lightning2  
SmallKitchenAppliances  
ScreenType  
Ham  
Computers  
SyntheticControl  
CBF  
TwoLeadECG  
Mallat  
ShapeletSim

Dataset name
