# Supplementary material
Source: ML conference proceedings conference paper supplement (https://openreview.net/forum?id=PDYs7Z2XFGv)

Accuracy and receptive field size  
on Google Speech commands datasets  
with different train/test split

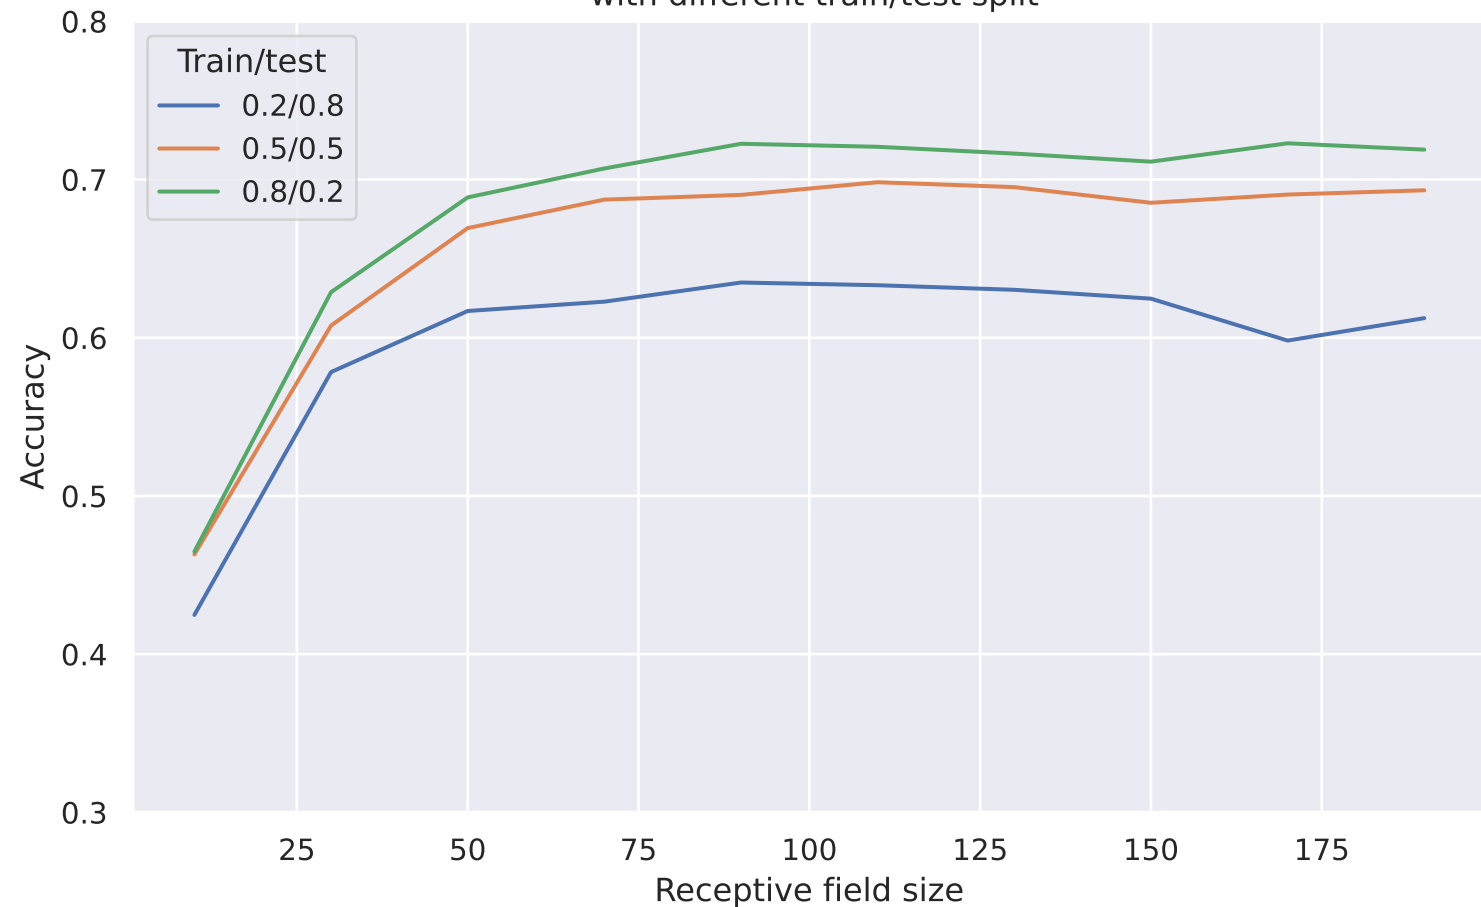

Supplement: supplementary_material [file attachment]
